# Supplementary material
Source: publisher site journal article supplement (https://www.dovepress.com/article/391749)
Supplement: Supplementary file 1 [file get_supplementary_file.php]

**Supplementary Materials**

Table of Contents

1. Supplementary techniques
2. Supplemental Table 1. HbA1c and HVS categories.
3. Supplemental Table 2. Detailed criteria used for outcome ascertainment.
4. Supplemental Table 3. Distribution of HbA1c categories for model 1 and 2 (by outcomes).
5. Supplemental Table 4. Distribution of events occurring during observation period (2015 – 2020).
6. Supplemental Table 5. Survival statistics by HbA1c category (Model 1: baseline mean HbA1c for 2013-2014) for different outcomes.
7. Supplemental Table 6. Survival statistics by HbA1c category (Model 2: total exposure mean, from 2013 to the year before an event occurred or the last year of follow-up) for different outcomes.
8. Supplemental Table 7. Survival statistics by HVS category for different outcomes.
9. Supplemental Table 8. Adjusted hazard ratios for all-cause mortality and other outcomes in models 1 to 3.
10. Supplemental Table 9. Adjusted hazard ratios for all-cause mortality and other outcomes, with HVS included in models 1 to 3.

**Supplementary Techniques**

**Defining diabetes duration**

The year of diagnosis of diabetes mellitus was determined from both hospital (inpatient and outpatient) and primary care diagnostic codes and laboratory results. Three criteria were used to determine the year of diabetes mellitus diagnosis:

1. Earliest record of HbA1c ≥7.0% (53 mmol/mol).
2. Earliest record of oral glucose tolerance test result ≥ 11.1 mmol/L.
3. Earliest record of DM diagnosis code from hospital inpatient (ICD-9 and/or ICD-10), hospital outpatient (SNOMED-CT) and primary care (SingHealth Polyclinic Working Diagnosis Codes [SHPWDC]) codes.

The earliest year from the above 3 criteria will be used as the diagnosis year. Diabetes duration is determined from the year of diagnosis.

**Defining and determining outcomes**

Outcomes ascertainment were performed through coding criterion and facilitated though the SingHealth – Integrated Health Information Systems (IHiS) agency ﻿Electronic Health INtelligence System (eHINTS) data repository.

Data on deaths were obtained from IHiS and the National Registry of Diseases Office (NRDO) databases. The criteria for complications include diagnosis codes, surgical codes and laboratory test records (the detailed criteria are provided in Supplemental Table 2). We harmonized the different standardized diagnosis codes used in SingHealth (ICD-10 CM for inpatients, SNOMED-CT for outpatients in tertiary institutions, and SingHealth Polyclinic Working Diagnosis Codes (SHPWDC) for primary care polyclinics) by defining the relevant diagnostic codes for each setting and outcome.

There are no reference standard ICD-10 codes for the most diabetes related complications, and classification and coding practices vary in the literature. In our study, we therefore referenced available literature when developing codes for diabetes related complications. As AMI is an outcome of importance, we distinguished AMI as a subset of the larger diagnostic code of ischemic heart disease. As there are no SNOMED-CT reference standard codes for diabetes related complications, we categorized such patients by performing a search for relevant conditions. Surgical codes were referenced from the Ministry of Health Singapore Table of Surgical Procedures.

**Supplemental Table 1. HbA1c and HVS categories used in the study**

| **HbA1c Category** | **HbA1c value (%)** | **HbA1c value (mmol/mol)** |
| --- | --- | --- |
| 1 | HbA1c < 6.0 | HbA1c < 42 |
| 2 | 6.0 ≤ HbA1c < 6.5 | 42 ≤ HbA1c < 48 |
| 3 | 6.5 ≤ HbA1c < 7.0 | 48 ≤ HbA1c < 53 |
| 4 | 7.0 ≤ HbA1c < 7.5 | 53 ≤ HbA1c < 58 |
| 5 | 7.5 ≤ HbA1c < 8.0 | 58 ≤ HbA1c < 64 |
| 6 | 8.0 ≤ HbA1c < 8.5 | 64 ≤ HbA1c < 69 |
| 7 | 8.5 ≤ HbA1c < 9.0 | 69 ≤ HbA1c < 75 |
| 8 | 9.0 ≤ HbA1c < 9.5 | 75 ≤ HbA1c < 80 |
| 9 | 9.5 ≤ HbA1c < 10 | 80 ≤ HbA1c < 86 |
| 10 | HbA1c ≥ 10 | HbA1c ≥ 86 |
| **HVS Category** | **HVS value (%)** | |
| 1 | 0 ≤ HVS ≤ 20 | |
| 2 | 20 < HVS ≤ 40 | |
| 3 | 40 < HVS ≤ 60 | |
| 4 | 60 < HVS ≤ 80 | |
| 5 | 80 < HVS ≤ 100 | |

**Supplemental Table 2. Detailed criteria used for outcome ascertainment.**

| **Outcome** | **Criterion** | | | **Healthcare setting** |
| --- | --- | --- | --- | --- |
| **ICD-10 codes** | **SNOMED codes** | **SHPWKC or Surgical codes** |
| Ischemic heart disease | ICD-10 I20.x, I21.x, I22.x, I24.x, I25.x | 89331010, 299761018, 299762013, 299782012, 299783019, 299784013, 350346019, 459859010, 1040100013, 1051100013, 1210398011, 1210399015, 1210505015, 2534663012, 2534664018, 2534667013, 2534671011, 2534672016, 2535853014, 2535854015, 2535923015, 2536394018, 2536395017, 2536397013, 2536398015, 2537479013, 2537480011, 2842265012, 2951007019, 2951008012, 2951009016, 2951010014, 2986368010, 2986970011, 3289323011 | 042A (Chronic ischemic heart disease), 042B (Acute ischemic heart disease), | Inpatient, outpatient and primary care. |
| Acute myocardial infarction | ICD-10 I21.x, I22.x, I 25.2 | - | - | Inpatient |
| Peripheral vascular disease | ICD-10 I70.2, I73.1, I73.8-73.9. | 18413012, 23786012, 46785011, 87530017, 105536013, 205224017, 300607015, 350531010, 350534019, 350535018, 350536017, 350543011, 350544017, 350545016, 350546015, 350547012, 350548019, 357894012, 357896014, 357897017, 357898010, 411512011, 443199013, 451376017, 456609017, 456610010, 456617013, 458506014, 458507017, 473473019, 484263016, 1232467011, 1233009011, 1779239017, 1779317016, 1787049010, 1787050010, 1787052019, 2157354010, 2162392019, 2693498010, 2693575017, 2693576016, 2773672016, 2921338010, 2923092011, 2923094012, 2923309015, 2923379016, 2955895013, 2956118016, 2983747016, 2983776018, 2985567012, 3040857018, 3289284017 | 047B (PVD), surgical codes (SD720A (Artery, Stenosis / Occlusion, Percutaneous Transluminal Angioplasty (PTA), Difficult (E.g. Subintimal PTA, Below Knee PTA)), SD728A (Artery, Various Lesions, Endovascular Stent Placement), SD713A (Artery, Bypass, Above/Below-Knee With Vein), SD717A (Artery, Femoral Artery Angioplasty), SD721A (Artery, Stenosis / Occlusion, Percutaneous Transluminal Angioplasty (PTA), Simple), SD714A (Artery, Bypass, Distal Leg/Pedal With Vein), SD719A (Artery, Stenosis / Occlusion, Percutaneous Atherectomy (Mechanical Or Laser))) | Inpatient, outpatient and primary care. |
| Haemorrhagic stroke | ICD-10 I60.0-61.9, I62.9, I69.0-69.2.  SNOMED and SHPWKC codes*. | 3421016, 13756016, 36011016, 39067013, 39068015, 42129011, 49074018, 79273012, 96391014, 123408011, 124627016, 124628014, 124629018, 134436018, 158109012, 158113017, 158114011, 158118014, 178528011, 251701010, 300271012, 300272017, 300277011, 300279014, 300321011, 300322016, 300365015, 300366019, 300369014, 300408017, 345635016, 345636015, 345637012, 345638019, 345640012, 345641011, 345642016, 345646018, 345647010, 345649013, 345651012, 345652017, 345653010, 345656019, 345659014, 345667018, 345671015, 345671015, 345675012, 345676013, 345677016, 345682011, 345694019, 345696017, 405377010, 405379013, 409859018, 409860011, 412270012, 412997011, 419212013, 419213015, 444898010, 450609012, 451133011, 451134017, 451371010, 475553012, 481028017, 481580017, 496232015, 502878012, 503469016, 1209750017, 1209751018, 1212072018, 1216125018, 1217312010, 1217630014, 1218800017, 1229580019, 2474651019, 2474986019, 2475187018, 2476091017, 2535208016, 2644233012, 2644234018, 2674093010, 2674127019, 2675250011, 2694009014, 2695743015, 2770034014, 2772089016, 2818561018, 2819959010, 2819960017, 2901452016, 2901453014, 2914970017, 2916313015, 2920376012, 2966556014, 2966565019, 2966596011, 2966602014, 2966650013, 2967471017, 2967506011, 2967537011, 2967598015, 2967601013, 2967609010, 2967628015, 2967650019, 2967701015, 2981993016, 2984150019, 2984188017, 2984239014, 2986393012, 2986825016, 2986886017, 2987976012, 3023367013, 3023374015, 3037871010, | 046A (Stroke (Haemorrhage)), 046B (Stroke (Not specified) | Inpatient, outpatient and primary care. |
| Ischaemic stroke | ICD-10 I63.x, I64.x, I69.3 – I69.4, G46.0-46.8.  SNOMED and SHPWKC codes*. | 42129011, 49074018, 79273012, 96391014, 134436018, 158113017, 158114011, 158118014, 178528011, 300321011, 300322016, 300365015, 300366019, 300369014, 345635016, 345636015, 345637012, 345638019, 345640012, 345641011, 345642016, 345646018, 345647010, 345649013, 345651012, 345652017, 345653010, 345656019, 345659014, 345671015, 345682011, 412270012, 419212013, 419213015, 444898010, 450609012, 451133011, 451134017, 451371010, 1209750017, 1209751018, 1212072018, 1229580019, 2474651019, 2476091017, 2535208016, 2644233012, 2644234018, 2674093010, 2674127019, 2675250011, 2695743015, 2770034014, 2772089016, 2818561018, 2914970017, 2920376012, 2966556014, 2966565019, 2966596011, 2966602014, 2966650013, 2967471017, 2967506011, 2967598015, 2967601013, 2967650019, 2967701015, 2981993016, 2986393012, 2986886017, 2987976012, 3023367013, 3023374015, 3037871010, | 046C (Stroke (Ischaemic/infarct)), 046B (Stroke (Not specified) | Inpatient, outpatient and primary care. |

**Supplemental Table 3. Distribution of HbA1c categories for model 1 and 2 (by outcomes).**

| **HbA1c category** | **HbA1c value (%)** | **Model 1** | **Model 2 (Death)** | **Model 2 (IHD)** | **Model 2 (AMI)** | **Model 2 (PAD)** | **Model 2 (Haemorrhagic stroke)** | **Model 2 (Ischemic stroke)** |
| --- | --- | --- | --- | --- | --- | --- | --- | --- |
| **n (%)** | **n (%)** | **n (%)** | **n (%)** | **n (%)** | **n (%)** | **n (%)** |
| 1 | HbA1c < 6.0 | 5790 (7.7) | 3308 (5.0) | 2971 (5.2) | 3302 (5.1) | 3305 (5.1) | 3305 (5.0) | 3164 (5.0) |
| 2 | 6.0 ≤ HbA1c < 6.5 | 11762 (17.8) | 7477 (11.3) | 6627 (10.1) | 7440 (11.3) | 7454 (11.3) | 7455 (11.3) | 7126 (10.8) |
| 3 | 6.5 ≤ HbA1c < 7.0 | 17749 (26.9) | 16901 (25.6) | 14753 (22.4) | 16818 (25.5) | 16781 (25.5) | 16870 (25.6) | 16205 (24.6) |
| 4 | 7.0 ≤ HbA1c < 7.5 | 14977 (22.7) | 15914 (24.1) | 13800 (20.9) | 15774 (23.9) | 15755 (23.9) | 15893 (24.1) | 15250 (23.1) |
| 5 | 7.5 ≤ HbA1c < 8.0 | 8846 (13.4) | 8921 (13.5) | 7670 (11.6) | 8770 (13.3) | 8823 (13.4) | 8893 (13.5) | 8561 (13.0) |
| 6 | 8.0 ≤ HbA1c < 8.5 | 5244 (8.0) | 5015 (7.6) | 4296 (6.5) | 4949 (7.5) | 4940 (7.5) | 4991 (7.6) | 4821 (7.3) |
| 7 | 8.5 ≤ HbA1c < 9.0 | 3555 (5.4) | 3088 (4.7) | 2631 (4.0) | 3032 (4.6) | 3002 (4.6) | 3084 (4.7) | 2971 (4.5) |
| 8 | 9.0 ≤ HbA1c < 9.5 | 2258 (3.4) | 1941 (2.9) | 1669 (2.5) | 1916 (2.9) | 1907 (2.9) | 1934 (2.9) | 1884 (2.9) |
| 9 | 9.5 ≤ HbA1c < 10 | 1627 (2.5) | 1281 (1.9) | 1127 (1.7) | 1262 (1.9) | 1268 (1.9) | 1284 (1.9) | 1256 (1.9) |
| 10 | HbA1c ≥ 10 | 3526 (5.3) | 2076 (3.1) | 1930 (2.9) | 2093 (3.2) | 2066 (3.1) | 2082 (3.2) | 2078 (3.2) |
|  | Total* | 75334 | 65922 | 57474 | 65356 | 65301 | 65791 | 63316 |

† Baseline mean HbA1c for 2013-2014.

‡ The mean across the whole follow-up period (i.e. from 2013 to the year before the participant died/outcome occurred or the last year of follow-up).

*The total counts for model 2 differs by outcome as the distribution of outcomes during the baseline and observation period are different.

**Supplemental Table 4. Distribution of events occurring during observation period (2015 – 2020).**

| **Event** | **Year** | | | | | | **Cumulative events during observation period** |
| --- | --- | --- | --- | --- | --- | --- | --- |
| **2015** | **2016** | **2017** | **2018** | **2019** | **2020** |
| Death | 1,985 | 1,900 | 1,968 | 1,791 | 1,723 | 1,660 | 11,027 |
| IHD | 2,237 | 2,607 | 2,648 | 2,750 | 2,622 | 949 | 13,813 |
| AMI | 787 | 868 | 1,013 | 997 | 1,116 | 680 | 5,461 |
| PAD | 522 | 666 | 717 | 725 | 862 | 444 | 3,936 |
| Haemorrhagic stroke | 133 | 281 | 274 | 257 | 290 | 217 | 1,452 |
| Ischemic stroke | 808 | 1,149 | 1,207 | 1,202 | 1,286 | 561 | 6,213 |

**Supplemental Table 5. Survival statistics by HbA1c category (Model 1: baseline mean HbA1c for 2013-2014) for different outcomes.**

| **HbA1c Category** | **n** | **1-year survival** | **3-year survival** | **5-year survival** | **6-year survival** | **Events** | **Person-year** | **Crude incidence (per 1000 person-years)** |
| --- | --- | --- | --- | --- | --- | --- | --- | --- |
| **All-cause mortality** | | | | | | | | |
| 1 | 5790 | 0.95 | 0.86 | 0.79 | 0.73 | 1194 | 26294 | 45.41 |
| 2 | 11762 | 0.97 | 0.91 | 0.85 | 0.80 | 1883 | 59497 | 31.65 |
| 3 | 17749 | 0.98 | 0.93 | 0.89 | 0.84 | 2219 | 94080 | 23.59 |
| 4 | 14977 | 0.98 | 0.93 | 0.89 | 0.85 | 1821 | 79558 | 22.89 |
| 5 | 8846 | 0.98 | 0.93 | 0.88 | 0.83 | 1196 | 46198 | 25.89 |
| 6 | 5244 | 0.97 | 0.91 | 0.85 | 0.81 | 809 | 26914 | 30.06 |
| 7 | 3555 | 0.97 | 0.92 | 0.86 | 0.80 | 549 | 18043 | 30.43 |
| 8 | 2258 | 0.97 | 0.90 | 0.84 | 0.78 | 383 | 11296 | 33.91 |
| 9 | 1627 | 0.97 | 0.90 | 0.83 | 0.78 | 282 | 8029 | 35.12 |
| 10 | 3526 | 0.96 | 0.89 | 0.81 | 0.75 | 691 | 17119 | 40.36 |
| Total | 75334 |  |  |  |  | 11027 | 387028 | 28.49 |
| **IHD** | | | | | | | | |
| 1 | 5790 | 0.95 | 0.84 | 0.73 | 0.70 | 1182 | 22253 | 53.12 |
| 2 | 11762 | 0.97 | 0.88 | 0.79 | 0.76 | 2022 | 48948 | 41.31 |
| 3 | 17749 | 0.97 | 0.90 | 0.82 | 0.79 | 2768 | 77641 | 35.65 |
| 4 | 14977 | 0.97 | 0.90 | 0.81 | 0.79 | 2377 | 65430 | 36.33 |
| 5 | 8846 | 0.96 | 0.88 | 0.78 | 0.74 | 1656 | 37657 | 43.98 |
| 6 | 5244 | 0.96 | 0.86 | 0.75 | 0.70 | 1113 | 21630 | 51.46 |
| 7 | 3555 | 0.95 | 0.85 | 0.74 | 0.69 | 764 | 14293 | 53.45 |
| 8 | 2258 | 0.95 | 0.83 | 0.70 | 0.66 | 553 | 8978 | 61.60 |
| 9 | 1627 | 0.95 | 0.83 | 0.69 | 0.65 | 402 | 6375 | 63.06 |
| 10 | 3526 | 0.95 | 0.81 | 0.66 | 0.62 | 976 | 13957 | 69.93 |
| Total | 75334 |  |  |  |  | 13813 | 317162 | 43.55 |
| **AMI** | | | | | | | | |
| 1 | 5790 | 0.98 | 0.95 | 0.91 | 0.89 | 441 | 26496 | 16.64 |
| 2 | 11762 | 0.99 | 0.97 | 0.94 | 0.92 | 708 | 59047 | 11.99 |
| 3 | 17749 | 0.99 | 0.97 | 0.95 | 0.93 | 1002 | 93036 | 10.77 |
| 4 | 14977 | 0.99 | 0.97 | 0.94 | 0.93 | 873 | 78327 | 11.15 |
| 5 | 8846 | 0.99 | 0.96 | 0.93 | 0.90 | 644 | 45474 | 14.16 |
| 6 | 5244 | 0.99 | 0.95 | 0.90 | 0.87 | 506 | 26175 | 19.33 |
| 7 | 3555 | 0.99 | 0.95 | 0.90 | 0.87 | 347 | 17570 | 19.75 |
| 8 | 2258 | 0.98 | 0.94 | 0.89 | 0.86 | 240 | 10968 | 21.88 |
| 9 | 1627 | 0.99 | 0.94 | 0.88 | 0.84 | 184 | 7794 | 23.61 |
| 10 | 3526 | 0.98 | 0.92 | 0.84 | 0.80 | 516 | 16559 | 31.16 |
| Total | 75334 |  |  |  |  | 5461 | 381446 | 14.32 |
| **PAD** | | | | | | | | |
| 1 | 5790 | 0.99 | 0.97 | 0.95 | 0.94 | 251 | 26716 | 9.40 |
| 2 | 11762 | 1.00 | 0.98 | 0.96 | 0.95 | 430 | 59303 | 7.25 |
| 3 | 17749 | 1.00 | 0.98 | 0.96 | 0.95 | 659 | 93271 | 7.07 |
| 4 | 14977 | 0.99 | 0.98 | 0.96 | 0.95 | 618 | 78672 | 7.86 |
| 5 | 8846 | 0.99 | 0.97 | 0.95 | 0.93 | 480 | 45338 | 10.59 |
| 6 | 5244 | 0.99 | 0.96 | 0.93 | 0.91 | 346 | 26241 | 13.19 |
| 7 | 3555 | 0.99 | 0.96 | 0.92 | 0.89 | 283 | 17576 | 16.10 |
| 8 | 2258 | 0.98 | 0.94 | 0.90 | 0.87 | 217 | 10994 | 19.74 |
| 9 | 1627 | 0.99 | 0.94 | 0.87 | 0.85 | 185 | 7732 | 23.93 |
| 10 | 3526 | 0.98 | 0.93 | 0.85 | 0.81 | 467 | 16465 | 28.36 |
| Total | 75334 |  |  |  |  | 3936 | 382308 | 10.30 |
| **Haemorrhagic stroke** | | | | | | | | |
| 1 | 5790 | 1.00 | 0.98 | 0.97 | 0.96 | 155 | 26817 | 5.78 |
| 2 | 11762 | 1.00 | 0.99 | 0.98 | 0.97 | 254 | 59780 | 4.25 |
| 3 | 17749 | 1.00 | 0.99 | 0.98 | 0.97 | 349 | 94214 | 3.70 |
| 4 | 14977 | 1.00 | 0.99 | 0.99 | 0.98 | 222 | 79774 | 2.78 |
| 5 | 8846 | 1.00 | 0.99 | 0.98 | 0.98 | 153 | 46479 | 3.29 |
| 6 | 5244 | 1.00 | 0.99 | 0.98 | 0.97 | 97 | 27027 | 3.59 |
| 7 | 3555 | 1.00 | 0.99 | 0.98 | 0.97 | 72 | 18210 | 3.95 |
| 8 | 2258 | 1.00 | 0.99 | 0.98 | 0.97 | 50 | 11380 | 4.39 |
| 9 | 1627 | 1.00 | 0.99 | 0.98 | 0.97 | 30 | 8119 | 3.70 |
| 10 | 3526 | 1.00 | 0.99 | 0.98 | 0.97 | 70 | 17359 | 4.03 |
| Total | 75334 |  |  |  |  | 1452 | 389159 | 3.73 |
| **Ischemic stroke** | | | | | | | | |
| 1 | 5790 | 0.98 | 0.93 | 0.88 | 0.85 | 575 | 24906 | 23.09 |
| 2 | 11762 | 0.99 | 0.95 | 0.90 | 0.88 | 1018 | 56059 | 18.16 |
| 3 | 17749 | 0.99 | 0.96 | 0.92 | 0.91 | 1265 | 88711 | 14.26 |
| 4 | 14977 | 0.99 | 0.96 | 0.93 | 0.91 | 1032 | 75830 | 13.61 |
| 5 | 8846 | 0.99 | 0.96 | 0.91 | 0.89 | 744 | 44013 | 16.90 |
| 6 | 5244 | 0.99 | 0.95 | 0.91 | 0.89 | 442 | 25513 | 17.32 |
| 7 | 3555 | 0.99 | 0.95 | 0.90 | 0.88 | 330 | 17238 | 19.14 |
| 8 | 2258 | 0.99 | 0.94 | 0.89 | 0.86 | 229 | 10749 | 21.30 |
| 9 | 1627 | 0.99 | 0.94 | 0.88 | 0.86 | 170 | 7634 | 22.27 |
| 10 | 3526 | 0.98 | 0.93 | 0.87 | 0.85 | 408 | 16300 | 25.03 |
| Total | 75334 |  |  |  |  | 6213 | 366953 | 16.93 |

**Supplemental Table 6. Survival statistics by HbA1c category (Model 2: total exposure mean, from 2013 to the year before an event occurred or the last year of follow-up) for different outcomes.**

| **HbA1c Category** | **n** | **1-year survival** | **3-year survival** | **5-year survival** | **6-year survival** | **Events** | **Person-year** | **Crude incidence (per 1000 person-years)** |
| --- | --- | --- | --- | --- | --- | --- | --- | --- |
| **All-cause mortality** | | | | | | | | | |
| 1 | 3308 | 0.94 | 0.84 | 0.77 | 0.72 | 782 | 16293 | 48.00 |
| 2 | 7477 | 0.97 | 0.91 | 0.86 | 0.82 | 1147 | 39929 | 28.73 |
| 3 | 16901 | 0.98 | 0.95 | 0.91 | 0.88 | 1703 | 94864 | 17.95 |
| 4 | 15914 | 0.98 | 0.95 | 0.92 | 0.89 | 1527 | 89730 | 17.02 |
| 5 | 8921 | 0.98 | 0.94 | 0.90 | 0.86 | 1062 | 49514 | 21.45 |
| 6 | 5015 | 0.97 | 0.92 | 0.88 | 0.84 | 696 | 27409 | 25.39 |
| 7 | 3088 | 0.98 | 0.93 | 0.88 | 0.83 | 434 | 16830 | 25.79 |
| 8 | 1941 | 0.97 | 0.92 | 0.87 | 0.84 | 267 | 10487 | 25.46 |
| 9 | 1281 | 0.97 | 0.91 | 0.86 | 0.82 | 190 | 6833 | 27.81 |
| 10 | 2076 | 0.96 | 0.90 | 0.85 | 0.81 | 336 | 10798 | 31.12 |
| Total | 65922 |  |  |  |  | 8144 | 362687 | 22.45 |
| **IHD** | | | | | | | | | |
| 1 | 2971 | 0.94 | 0.81 | 0.70 | 0.67 | 828 | 13532 | 61.19 |
| 2 | 6627 | 0.96 | 0.87 | 0.77 | 0.74 | 1483 | 32749 | 45.28 |
| 3 | 14753 | 0.98 | 0.91 | 0.84 | 0.81 | 2454 | 78260 | 31.36 |
| 4 | 13800 | 0.97 | 0.91 | 0.84 | 0.81 | 2334 | 73365 | 31.81 |
| 5 | 7670 | 0.97 | 0.89 | 0.80 | 0.76 | 1625 | 39530 | 41.11 |
| 6 | 4296 | 0.96 | 0.86 | 0.76 | 0.71 | 1077 | 21542 | 50.00 |
| 7 | 2631 | 0.96 | 0.85 | 0.74 | 0.70 | 684 | 13010 | 52.57 |
| 8 | 1669 | 0.95 | 0.84 | 0.72 | 0.68 | 466 | 8093 | 57.58 |
| 9 | 1127 | 0.96 | 0.82 | 0.70 | 0.66 | 334 | 5362 | 62.29 |
| 10 | 1930 | 0.94 | 0.80 | 0.66 | 0.61 | 643 | 8875 | 72.45 |
| Total | 57474 |  |  |  |  | 11928 | 294318 | 40.53 |
| **AMI** | | | | | | | | | |
| 1 | 3302 | 0.98 | 0.93 | 0.89 | 0.87 | 327 | 16025 | 20.41 |
| 2 | 7440 | 0.99 | 0.97 | 0.94 | 0.92 | 486 | 39215 | 12.39 |
| 3 | 16818 | 0.99 | 0.98 | 0.95 | 0.94 | 859 | 93383 | 9.20 |
| 4 | 15774 | 0.99 | 0.97 | 0.95 | 0.93 | 864 | 87878 | 9.83 |
| 5 | 8770 | 0.99 | 0.97 | 0.93 | 0.91 | 644 | 47970 | 13.43 |
| 6 | 4949 | 0.99 | 0.95 | 0.91 | 0.88 | 468 | 26480 | 17.67 |
| 7 | 3032 | 0.99 | 0.95 | 0.90 | 0.86 | 320 | 16137 | 19.83 |
| 8 | 1916 | 0.98 | 0.94 | 0.89 | 0.86 | 219 | 10035 | 21.82 |
| 9 | 1262 | 0.99 | 0.94 | 0.88 | 0.85 | 149 | 6535 | 22.80 |
| 10 | 2093 | 0.98 | 0.91 | 0.84 | 0.82 | 315 | 10475 | 30.07 |
| Total | 65356 |  |  |  |  | 4651 | 354133 | 13.13 |
| **PAD** | | | | | | | | | |
| 1 | 3305 | 0.99 | 0.97 | 0.94 | 0.94 | 162 | 16154 | 10.03 |
| 2 | 7454 | 0.99 | 0.98 | 0.96 | 0.95 | 313 | 39428 | 7.94 |
| 3 | 16781 | 1.00 | 0.98 | 0.97 | 0.96 | 587 | 93348 | 6.29 |
| 4 | 15755 | 1.00 | 0.98 | 0.97 | 0.95 | 576 | 88029 | 6.54 |
| 5 | 8823 | 0.99 | 0.97 | 0.94 | 0.93 | 508 | 48266 | 10.53 |
| 6 | 4940 | 0.99 | 0.96 | 0.93 | 0.91 | 362 | 26473 | 13.67 |
| 7 | 3002 | 0.99 | 0.95 | 0.92 | 0.89 | 271 | 15962 | 16.98 |
| 8 | 1907 | 0.99 | 0.95 | 0.89 | 0.87 | 204 | 10014 | 20.37 |
| 9 | 1268 | 0.98 | 0.95 | 0.90 | 0.87 | 129 | 6552 | 19.69 |
| 10 | 2066 | 0.98 | 0.93 | 0.86 | 0.81 | 295 | 10328 | 28.56 |
| Total | 65301 |  |  |  |  | 3407 | 354554 | 9.61 |
| **Haemorrhagic stroke** | | | | | | | | | |
| 1 | 3305 | 1.00 | 0.98 | 0.97 | 0.95 | 102 | 16186 | 6.30 |
| 2 | 7455 | 1.00 | 0.99 | 0.98 | 0.97 | 179 | 39559 | 4.52 |
| 3 | 16870 | 1.00 | 0.99 | 0.98 | 0.98 | 326 | 94211 | 3.46 |
| 4 | 15893 | 1.00 | 0.99 | 0.99 | 0.98 | 242 | 89290 | 2.71 |
| 5 | 8893 | 1.00 | 0.99 | 0.98 | 0.98 | 158 | 49168 | 3.21 |
| 6 | 4991 | 1.00 | 0.99 | 0.98 | 0.98 | 88 | 27148 | 3.24 |
| 7 | 3084 | 1.00 | 0.99 | 0.98 | 0.98 | 59 | 16725 | 3.53 |
| 8 | 1934 | 1.00 | 0.99 | 0.98 | 0.97 | 39 | 10397 | 3.75 |
| 9 | 1284 | 1.00 | 0.99 | 0.98 | 0.97 | 27 | 6809 | 3.97 |
| 10 | 2082 | 1.00 | 0.99 | 0.98 | 0.97 | 38 | 10781 | 3.52 |
| Total | 65791 |  |  |  |  | 1258 | 360274 | 3.49 |
| **Ischemic stroke** | | | | | | | | | |
| 1 | 3164 | 0.97 | 0.92 | 0.86 | 0.83 | 410 | 15147 | 27.07 |
| 2 | 7126 | 0.99 | 0.94 | 0.90 | 0.88 | 686 | 37119 | 18.48 |
| 3 | 16205 | 0.99 | 0.96 | 0.93 | 0.92 | 1152 | 89130 | 12.92 |
| 4 | 15250 | 0.99 | 0.97 | 0.94 | 0.92 | 1038 | 84365 | 12.30 |
| 5 | 8561 | 0.99 | 0.96 | 0.92 | 0.90 | 689 | 46421 | 14.84 |
| 6 | 4821 | 0.99 | 0.95 | 0.92 | 0.89 | 424 | 25652 | 16.53 |
| 7 | 2971 | 0.99 | 0.95 | 0.90 | 0.87 | 305 | 15739 | 19.38 |
| 8 | 1884 | 0.99 | 0.94 | 0.90 | 0.88 | 194 | 9858 | 19.68 |
| 9 | 1256 | 0.99 | 0.94 | 0.89 | 0.86 | 138 | 6477 | 21.31 |
| 10 | 2078 | 0.98 | 0.92 | 0.85 | 0.83 | 289 | 10322 | 28.00 |
| Total | 63316 |  |  |  |  | 5325 | 340230 | 15.65 |

**Supplemental Table 7. Survival statistics by HVS category for different outcomes.**

| **HVS Category** | **n** | **1-year survival** | **3-year survival** | **5-year survival** | **6-year survival** | **Events** | **Person-year** | **Crude incidence (per 1000 person-years)** |
| --- | --- | --- | --- | --- | --- | --- | --- | --- |
| **All-cause mortality** | | | | | | | | | |
| 1 | 22169 | 0.98 | 0.94 | 0.89 | 0.85 | 2641 | 117163 | 22.54 |
| 2 | 16392 | 0.97 | 0.93 | 0.88 | 0.83 | 2190 | 86178 | 25.41 |
| 3 | 17309 | 0.97 | 0.91 | 0.86 | 0.81 | 2604 | 88398 | 29.46 |
| 4 | 11895 | 0.96 | 0.90 | 0.83 | 0.77 | 2166 | 59709 | 36.28 |
| 5 | 7569 | 0.96 | 0.88 | 0.81 | 0.75 | 1426 | 35580 | 40.08 |
| Total | 75334 |  |  |  |  | 11027 | 387028 | 28.49 |
| **IHD** | | | | | | | | | |
| 1 | 22169 | 0.97 | 0.90 | 0.82 | 0.79 | 3384 | 97358 | 34.76 |
| 2 | 16392 | 0.97 | 0.89 | 0.80 | 0.77 | 2767 | 70505 | 39.25 |
| 3 | 17309 | 0.96 | 0.87 | 0.77 | 0.73 | 3310 | 72307 | 45.78 |
| 4 | 11895 | 0.95 | 0.85 | 0.73 | 0.69 | 2609 | 47937 | 54.43 |
| 5 | 7569 | 0.95 | 0.83 | 0.70 | 0.67 | 1743 | 29055 | 59.99 |
| Total | 75334 |  |  |  |  | 13813 | 317162 | 43.55 |
| **AMI** | | | | | | | | | |
| 1 | 22169 | 0.99 | 0.98 | 0.96 | 0.94 | 1034 | 116518 | 8.87 |
| 2 | 16392 | 0.99 | 0.97 | 0.94 | 0.92 | 1026 | 84933 | 12.08 |
| 3 | 17309 | 0.99 | 0.96 | 0.92 | 0.89 | 1379 | 86997 | 15.85 |
| 4 | 11895 | 0.99 | 0.94 | 0.89 | 0.87 | 1178 | 58064 | 20.29 |
| 5 | 7569 | 0.98 | 0.93 | 0.87 | 0.85 | 844 | 34934 | 24.16 |
| Total | 75334 |  |  |  |  | 5461 | 381446 | 14.32 |
| **PAD** | | | | | | | | | |
| 1 | 22169 | 1.00 | 0.99 | 0.97 | 0.96 | 601 | 116823 | 5.14 |
| 2 | 16392 | 0.99 | 0.98 | 0.95 | 0.94 | 748 | 84971 | 8.80 |
| 3 | 17309 | 0.99 | 0.97 | 0.94 | 0.92 | 975 | 87289 | 11.17 |
| 4 | 11895 | 0.99 | 0.96 | 0.92 | 0.90 | 918 | 58072 | 15.81 |
| 5 | 7569 | 0.98 | 0.94 | 0.90 | 0.87 | 694 | 35153 | 19.74 |
| Total | 75334 |  |  |  |  | 3936 | 382308 | 10.30 |
| **Haemorrhagic stroke** | | | | | | | | | |
| 1 | 22169 | 1.00 | 0.99 | 0.98 | 0.97 | 419 | 117451 | 3.57 |
| 2 | 16392 | 1.00 | 0.99 | 0.98 | 0.98 | 287 | 86233 | 3.33 |
| 3 | 17309 | 1.00 | 0.99 | 0.98 | 0.97 | 329 | 89181 | 3.69 |
| 4 | 11895 | 1.00 | 0.99 | 0.98 | 0.97 | 260 | 59896 | 4.34 |
| 5 | 7569 | 1.00 | 0.99 | 0.98 | 0.97 | 157 | 36398 | 4.31 |
| Total | 75334 |  |  |  |  | 1452 | 389159 | 3.73 |
| **Ischemic stroke** | | | | | | | | | |
| 1 | 22169 | 0.99 | 0.96 | 0.93 | 0.90 | 1576 | 110886 | 14.21 |
| 2 | 16392 | 0.99 | 0.96 | 0.92 | 0.90 | 1256 | 81473 | 15.42 |
| 3 | 17309 | 0.99 | 0.95 | 0.91 | 0.89 | 1427 | 84244 | 16.94 |
| 4 | 11895 | 0.98 | 0.94 | 0.89 | 0.87 | 1175 | 56085 | 20.95 |
| 5 | 7569 | 0.98 | 0.94 | 0.88 | 0.86 | 779 | 34265 | 22.73 |
| Total | 75334 |  |  |  |  | 6213 | 366953 | 16.93 |

**Supplemental Table 8. Adjusted hazard ratios for all-cause mortality and other outcomes in models 1 to 3.**

| **All-cause mortality** | | | | | | | | | | | | | | | | |
| --- | --- | --- | --- | --- | --- | --- | --- | --- | --- | --- | --- | --- | --- | --- | --- | --- |
| HbA1c category | HbA1c value (%) | Model 1 (baseline mean 2013-2014) | | | |  | Model 2 (total exposure mean) | | | |  | Model 3 (time-varying mean) | | | |  |
| Hazard ratio | SD | P-value | [95% CI] |  | Hazard ratio | SD | P-value | [95% CI] |  | Hazard ratio | SD | P-value | [95% CI] |  |
| 1 | HbA1c < 6.0 | 1.15 | 0.06 | 0.011 | (1.03, 1.29) |  | 1.52 | 0.10 | <0.001 | (1.34, 1.73) |  | 2.94 | 0.15 | <0.001 | (2.65, 3.26) |  |
| 2 | 6.0 ≤ HbA1c < 6.5 | 1.04 | 0.05 | 0.331 | (0.96, 1.14) |  | 1.31 | 0.07 | <0.001 | (1.18, 1.46) |  | 1.42 | 0.07 | <0.001 | (1.28, 1.57) |  |
| 3 | 6.5 ≤ HbA1c < 7.0 | 0.97 | 0.04 | 0.531 | (0.90, 1.06) |  | 1.08 | 0.05 | 0.100 | (0.99, 1.18) |  | 1.15 | 0.06 | 0.007 | (1.04, 1.26) |  |
| 4† | 7.0 ≤ HbA1c < 7.5 | 1.00 | - | - | - |  | 1.00 | - | - | - |  | 1.00 | - | - | - |  |
| 5 | 7.5 ≤ HbA1c < 8.0 | 1.16 | 0.06 | 0.001 | (1.06, 1.28) |  | 1.25 | 0.06 | <0.001 | (1.13, 1.37) |  | 1.11 | 0.06 | 0.082 | (0.99, 1.24) |  |
| 6 | 8.0 ≤ HbA1c < 8.5 | 1.38 | 0.08 | <0.001 | (1.24, 1.53) |  | 1.48 | 0.09 | <0.001 | (1.32, 1.65) |  | 1.14 | 0.08 | 0.050 | (1.00, 1.30) |  |
| 7 | 8.5 ≤ HbA1c < 9.0 | 1.47 | 0.09 | <0.001 | (1.30, 1.66) |  | 1.50 | 0.11 | <0.001 | (1.30, 1.72) |  | 1.38 | 0.10 | <0.001 | (1.19, 1.60) |  |
| 8 | 9.0 ≤ HbA1c < 9.5 | 1.82 | 0.13 | <0.001 | (1.58, 2.10) |  | 1.56 | 0.14 | <0.001 | (1.30, 1.86) |  | 1.38 | 0.12 | <0.001 | (1.16, 1.64) |  |
| 9 | 9.5 ≤ HbA1c < 10 | 1.85 | 0.15 | <0.001 | (1.57, 2.18) |  | 2.09 | 0.20 | <0.001 | (1.73, 2.53) |  | 1.44 | 0.15 | 0.001 | (1.17, 1.76) |  |
| 10 | HbA1c ≥ 10 | 2.12 | 0.13 | <0.001 | (1.87, 2.40) |  | 2.53 | 0.21 | <0.001 | (2.14, 2.98) |  | 1.97 | 0.14 | <0.001 | (1.72, 2.27) |  |
|  |  |  |  |  |  |  |  |  |  |  |  |  |  |  |  |  |
| Number of subjects in model | | 53,934 | | | |  | 50,483 | | | |  | 53,432 | | | |  |
|  |  |  |  |  |  |  |  |  |  |  |  |  |  |  |  |  |
| **IHD** | | | | | | | | | | | | | | | | |
| HbA1c category | HbA1c value (%) | Model 1 (baseline mean 2013-2014) | | | |  | Model 2 (total exposure mean) | | | |  | Model 3 (time-varying mean) | | | |  |
| Hazard ratio | SD | P-value | [95% CI] |  | Hazard ratio | SD | P-value | [95% CI] |  | Hazard ratio | SD | P-value | [95% CI] |  |
| 1 | HbA1c < 6.0 | 1.12 | 0.06 | 0.032 | (1.01, 1.23) |  | 1.45 | 0.08 | <0.001 | (1.29, 1.62) |  | 1.91 | 0.08 | <0.001 | (1.76, 2.08) |  |
| 2 | 6.0 ≤ HbA1c < 6.5 | 0.99 | 0.04 | 0.786 | (0.91, 1.07) |  | 1.28 | 0.06 | <0.001 | (1.18, 1.40) |  | 1.17 | 0.05 | <0.001 | (1.08, 1.27) |  |
| 3 | 6.5 ≤ HbA1c < 7.0 | 0.94 | 0.03 | 0.074 | (0.88, 1.01) |  | 1.01 | 0.04 | 0.785 | (0.94, 1.08) |  | 1.06 | 0.04 | 0.089 | (0.99, 1.14) |  |
| 4† | 7.0 ≤ HbA1c < 7.5 | 1.00 | - | - | - |  | 1.00 | - | - | - |  | 1.00 | - | - | - |  |
| 5 | 7.5 ≤ HbA1c < 8.0 | 1.09 | 0.04 | 0.029 | (1.01, 1.18) |  | 1.18 | 0.05 | <0.001 | (1.09, 1.27) |  | 1.07 | 0.04 | 0.097 | (0.99, 1.16) |  |
| 6 | 8.0 ≤ HbA1c < 8.5 | 1.19 | 0.06 | <0.001 | (1.09, 1.30) |  | 1.26 | 0.06 | <0.001 | (1.15, 1.38) |  | 1.10 | 0.05 | 0.041 | (1.00, 1.22) |  |
| 7 | 8.5 ≤ HbA1c < 9.0 | 1.21 | 0.06 | <0.001 | (1.09, 1.34) |  | 1.23 | 0.07 | <0.001 | (1.10, 1.37) |  | 1.11 | 0.06 | 0.075 | (0.99, 1.24) |  |
| 8 | 9.0 ≤ HbA1c < 9.5 | 1.41 | 0.09 | <0.001 | (1.25, 1.59) |  | 1.39 | 0.09 | <0.001 | (1.22, 1.59) |  | 1.23 | 0.08 | 0.001 | (1.08, 1.40) |  |
| 9 | 9.5 ≤ HbA1c < 10 | 1.38 | 0.10 | <0.001 | (1.20, 1.58) |  | 1.60 | 0.12 | <0.001 | (1.38, 1.86) |  | 1.14 | 0.09 | 0.101 | (0.98, 1.33) |  |
| 10 | HbA1c ≥ 10 | 1.50 | 0.08 | <0.001 | (1.36, 1.67) |  | 1.83 | 0.11 | <0.001 | (1.62, 2.06) |  | 1.49 | 0.08 | <0.001 | (1.34, 1.65) |  |
|  |  |  |  |  |  |  |  |  |  |  |  |  |  |  |  |  |
| Number of subjects in model | | 46,980 | | | |  | 43,837 | | | |  | 53,432 | | | |  |
|  |  |  |  |  |  |  |  |  |  |  |  |  |  |  |  |  |
| **AMI** | | | | | | | | | | | | | | | | |
| HbA1c category | HbA1c value (%) | Model 1 (baseline mean 2013-2014) | | | |  | Model 2 (total exposure mean) | | | |  | Model 3 (time-varying mean) | | | |  |
| Hazard ratio | SD | P-value | [95% CI] |  | Hazard ratio | SD | P-value | [95% CI] |  | Hazard ratio | SD | P-value | [95% CI] |  |
| 1 | HbA1c < 6.0 | 1.09 | 0.09 | 0.306 | (0.93, 1.28) |  | 1.62 | 0.15 | <0.001 | (1.36, 1.93) |  | 2.33 | 0.16 | <0.001 | (2.03, 2.66) |  |
| 2 | 6.0 ≤ HbA1c < 6.5 | 0.91 | 0.06 | 0.140 | (0.80, 1.03) |  | 1.19 | 0.09 | 0.018 | (1.03, 1.37) |  | 1.33 | 0.09 | <0.001 | (1.17, 1.52) |  |
| 3 | 6.5 ≤ HbA1c < 7.0 | 0.97 | 0.06 | 0.604 | (0.87, 1.09) |  | 0.96 | 0.06 | 0.499 | (0.86, 1.08) |  | 1.08 | 0.07 | 0.214 | (0.96, 1.22) |  |
| 4† | 7.0 ≤ HbA1c < 7.5 | 1.00 | - | - | - |  | 1.00 | - | - | - |  | 1.00 | - | - | - |  |
| 5 | 7.5 ≤ HbA1c < 8.0 | 1.05 | 0.07 | 0.429 | (0.93, 1.19) |  | 1.09 | 0.07 | 0.178 | (0.96, 1.23) |  | 1.01 | 0.07 | 0.832 | (0.88, 1.16) |  |
| 6 | 8.0 ≤ HbA1c < 8.5 | 1.39 | 0.10 | <0.001 | (1.21, 1.59) |  | 1.31 | 0.09 | <0.001 | (1.14, 1.50) |  | 1.07 | 0.08 | 0.360 | (0.92, 1.25) |  |
| 7 | 8.5 ≤ HbA1c < 9.0 | 1.31 | 0.10 | 0.001 | (1.12, 1.53) |  | 1.22 | 0.10 | 0.015 | (1.04, 1.44) |  | 1.17 | 0.10 | 0.086 | (0.98, 1.39) |  |
| 8 | 9.0 ≤ HbA1c < 9.5 | 1.44 | 0.13 | <0.001 | (1.20, 1.72) |  | 1.26 | 0.13 | 0.023 | (1.03, 1.53) |  | 1.03 | 0.11 | 0.813 | (0.83, 1.27) |  |
| 9 | 9.5 ≤ HbA1c < 10 | 1.41 | 0.15 | 0.001 | (1.15, 1.73) |  | 1.58 | 0.17 | <0.001 | (1.27, 1.96) |  | 1.16 | 0.14 | 0.200 | (0.92, 1.47) |  |
| 10 | HbA1c ≥ 10 | 1.76 | 0.13 | <0.001 | (1.52, 2.04) |  | 1.88 | 0.17 | <0.001 | (1.58, 2.25) |  | 1.28 | 0.11 | 0.003 | (1.09, 1.52) |  |
|  |  |  |  |  |  |  |  |  |  |  |  |  |  |  |  |  |
| Number of subjects in model | | 53,583 | | | |  | 50,067 | | | |  | 53,432 | | | |  |
|  |  |  |  |  |  |  |  |  |  |  |  |  |  |  |  |  |
| **PAD** | | | | | | | | | | | | | | | | |
| HbA1c category | HbA1c value (%) | Model 1 (baseline mean 2013-2014) | | | |  | Model 2 (total exposure mean) | | | |  | Model 3 (time-varying mean) | | | |  |
| Hazard ratio | SD | P-value | [95% CI] |  | Hazard ratio | SD | P-value | [95% CI] |  | Hazard ratio | SD | P-value | [95% CI] |  |
| 1 | HbA1c < 6.0 | 1.02 | 0.11 | 0.870 | (0.82, 1.26) |  | 1.09 | 0.14 | 0.498 | (0.84, 1.42) |  | 1.73 | 0.16 | <0.001 | (1.45, 2.07) |  |
| 2 | 6.0 ≤ HbA1c < 6.5 | 0.87 | 0.07 | 0.093 | (0.73, 1.02) |  | 1.12 | 0.11 | 0.213 | (0.94, 1.35) |  | 1.24 | 0.10 | 0.008 | (1.06, 1.46) |  |
| 3 | 6.5 ≤ HbA1c < 7.0 | 1.00 | 0.07 | 0.996 | (0.87, 1.15) |  | 1.08 | 0.08 | 0.280 | (0.94, 1.25) |  | 1.17 | 0.09 | 0.034 | (1.01, 1.35) |  |
| 4† | 7.0 ≤ HbA1c < 7.5 | 1.00 | - | - | - |  | 1.00 | - | - | - |  | 1.00 | - | - | - |  |
| 5 | 7.5 ≤ HbA1c < 8.0 | 1.22 | 0.09 | 0.009 | (1.05, 1.43) |  | 1.27 | 0.10 | 0.002 | (1.09, 1.47) |  | 1.04 | 0.09 | 0.617 | (0.88, 1.23) |  |
| 6 | 8.0 ≤ HbA1c < 8.5 | 1.32 | 0.11 | 0.001 | (1.11, 1.56) |  | 1.44 | 0.12 | <0.001 | (1.22, 1.71) |  | 1.15 | 0.11 | 0.118 | (0.96, 1.38) |  |
| 7 | 8.5 ≤ HbA1c < 9.0 | 1.44 | 0.14 | <0.001 | (1.20, 1.73) |  | 1.60 | 0.15 | <0.001 | (1.33, 1.94) |  | 1.10 | 0.12 | 0.357 | (0.89, 1.37) |  |
| 8 | 9.0 ≤ HbA1c < 9.5 | 1.89 | 0.19 | <0.001 | (1.55, 2.31) |  | 1.88 | 0.20 | <0.001 | (1.52, 2.32) |  | 1.28 | 0.15 | 0.036 | (1.02, 1.61) |  |
| 9 | 9.5 ≤ HbA1c < 10 | 2.13 | 0.23 | <0.001 | (1.72, 2.64) |  | 1.78 | 0.23 | <0.001 | (1.38, 2.31) |  | 1.37 | 0.18 | 0.016 | (1.06, 1.78) |  |
| 10 | HbA1c ≥ 10 | 2.16 | 0.19 | <0.001 | (1.82, 2.57) |  | 2.76 | 0.28 | <0.001 | (2.27, 3.37) |  | 1.54 | 0.15 | <0.001 | (1.28, 1.86) |  |
|  |  |  |  |  |  |  |  |  |  |  |  |  |  |  |  |  |
| Number of subjects in model | | 53,626 | | | |  | 50,054 | | | |  | 53,432 | | | |  |
|  |  |  |  |  |  |  |  |  |  |  |  |  |  |  |  |  |
| **Hemorrhagic stroke** | | | | | | | | | | | | | | | | |
| HbA1c category | HbA1c value (%) | Model 1 (baseline mean 2013-2014) | | | |  | Model 2 (total exposure mean) | | | |  | Model 3 (time-varying mean) | | | |  |
| Hazard ratio | SD | P-value | [95% CI] |  | Hazard ratio | SD | P-value | [95% CI] |  | Hazard ratio | SD | P-value | [95% CI] |  |
| 1 | HbA1c < 6.0 | 1.53 | 0.23 | 0.004 | (1.15, 2.04) |  | 1.81 | 0.30 | <0.001 | (1.31, 2.50) |  | 2.02 | 0.26 | <0.001 | (1.57, 2.59) |  |
| 2 | 6.0 ≤ HbA1c < 6.5 | 1.23 | 0.15 | 0.079 | (0.98, 1.56) |  | 1.48 | 0.19 | 0.003 | (1.15, 1.90) |  | 1.21 | 0.15 | 0.120 | (0.95, 1.53) |  |
| 3 | 6.5 ≤ HbA1c < 7.0 | 1.22 | 0.13 | 0.064 | (0.99, 1.49) |  | 1.31 | 0.14 | 0.009 | (1.07, 1.61) |  | 1.05 | 0.12 | 0.639 | (0.85, 1.31) |  |
| 4† | 7.0 ≤ HbA1c < 7.5 | 1.00 | - | - | - |  | 1.00 | - | - | - |  | 1.00 | - | - | - |  |
| 5 | 7.5 ≤ HbA1c < 8.0 | 1.11 | 0.14 | 0.440 | (0.86, 1.42) |  | 1.08 | 0.14 | 0.550 | (0.84, 1.38) |  | 0.86 | 0.12 | 0.278 | (0.66, 1.13) |  |
| 6 | 8.0 ≤ HbA1c < 8.5 | 1.23 | 0.19 | 0.162 | (0.92, 1.66) |  | 1.11 | 0.17 | 0.512 | (0.82, 1.5) |  | 1.00 | 0.15 | 0.976 | (0.74, 1.35) |  |
| 7 | 8.5 ≤ HbA1c < 9.0 | 1.49 | 0.25 | 0.016 | (1.08, 2.06) |  | 1.08 | 0.21 | 0.669 | (0.75, 1.57) |  | 0.80 | 0.16 | 0.283 | (0.54, 1.2) |  |
| 8 | 9.0 ≤ HbA1c < 9.5 | 1.52 | 0.31 | 0.039 | (1.02, 2.27) |  | 1.42 | 0.31 | 0.115 | (0.92, 2.18) |  | 0.89 | 0.21 | 0.633 | (0.56, 1.42) |  |
| 9 | 9.5 ≤ HbA1c < 10 | 1.35 | 0.33 | 0.228 | (0.83, 2.19) |  | 1.53 | 0.40 | 0.101 | (0.92, 2.55) |  | 1.36 | 0.32 | 0.186 | (0.86, 2.16) |  |
| 10 | HbA1c ≥ 10 | 1.40 | 0.26 | 0.071 | (0.97, 2.03) |  | 1.62 | 0.36 | 0.031 | (1.05, 2.52) |  | 1.03 | 0.20 | 0.872 | (0.7, 1.52) |  |
|  |  |  |  |  |  |  |  |  |  |  |  |  |  |  |  |  |
| Number of subjects in model | | 54,071 | | | |  | 50,403 | | | |  | 53,432 | | | |  |
|  |  |  |  |  |  |  |  |  |  |  |  |  |  |  |  |  |
| **Ischemic stroke** | | | | | | | | | | | | | | | | |
| HbA1c category | HbA1c value (%) | Model 1 (baseline mean 2013-2014) | | | |  | Model 2 (total exposure mean) | | | |  | Model 3 (time-varying mean) | | | |  |
| Hazard ratio | SD | P-value | [95% CI] |  | Hazard ratio | SD | P-value | [95% CI] |  | Hazard ratio | SD | P-value | [95% CI] |  |
| 1 | HbA1c < 6.0 | 1.16 | 0.09 | 0.064 | (0.99, 1.35) |  | 1.40 | 0.12 | <0.001 | (1.19, 1.66) |  | 1.95 | 0.13 | <0.001 | (1.70, 2.22) |  |
| 2 | 6.0 ≤ HbA1c < 6.5 | 1.09 | 0.07 | 0.147 | (0.97, 1.23) |  | 1.22 | 0.08 | 0.002 | (1.08, 1.39) |  | 1.25 | 0.08 | <0.001 | (1.10, 1.41) |  |
| 3 | 6.5 ≤ HbA1c < 7.0 | 1.01 | 0.05 | 0.902 | (0.91, 1.12) |  | 0.98 | 0.05 | 0.639 | (0.88, 1.08) |  | 1.04 | 0.06 | 0.521 | (0.93, 1.16) |  |
| 4† | 7.0 ≤ HbA1c < 7.5 | 1.00 | - | - | - |  | 1.00 | - | - | - |  | 1.00 | - | - | - |  |
| 5 | 7.5 ≤ HbA1c < 8.0 | 1.30 | 0.08 | <0.001 | (1.15, 1.46) |  | 1.12 | 0.07 | 0.060 | (0.99, 1.26) |  | 1.04 | 0.07 | 0.556 | (0.91, 1.19) |  |
| 6 | 8.0 ≤ HbA1c < 8.5 | 1.32 | 0.10 | <0.001 | (1.15, 1.53) |  | 1.27 | 0.09 | 0.001 | (1.10, 1.46) |  | 1.21 | 0.09 | 0.012 | (1.04, 1.40) |  |
| 7 | 8.5 ≤ HbA1c < 9.0 | 1.48 | 0.12 | <0.001 | (1.26, 1.74) |  | 1.51 | 0.13 | <0.001 | (1.29, 1.78) |  | 1.41 | 0.12 | <0.001 | (1.19, 1.67) |  |
| 8 | 9.0 ≤ HbA1c < 9.5 | 1.63 | 0.16 | <0.001 | (1.35, 1.97) |  | 1.59 | 0.16 | <0.001 | (1.30, 1.94) |  | 1.17 | 0.13 | 0.143 | (0.95, 1.46) |  |
| 9 | 9.5 ≤ HbA1c < 10 | 1.70 | 0.19 | <0.001 | (1.37, 2.12) |  | 1.96 | 0.22 | <0.001 | (1.57, 2.45) |  | 1.52 | 0.18 | <0.001 | (1.21, 1.91) |  |
| 10 | HbA1c ≥ 10 | 2.11 | 0.17 | <0.001 | (1.80, 2.47) |  | 2.58 | 0.24 | <0.001 | (2.15, 3.09) |  | 1.88 | 0.15 | <0.001 | (1.60, 2.21) |  |
|  |  |  |  |  |  |  |  |  |  |  |  |  |  |  |  |  |
| Number of subjects in model | | 52,077 | | | |  | 48,579 | | | |  | 53,432 | | | |  |
|  |  |  |  |  |  |  |  |  |  |  |  |  |  |  |  |  |

† HbA1c category 4 used as reference.

**Supplemental Table 9. Adjusted hazard ratios for all-cause mortality and other outcomes, with HVS included in models 1 to 3.**

| **All-cause mortality** | | | | | | | | | | | | | | | | |
| --- | --- | --- | --- | --- | --- | --- | --- | --- | --- | --- | --- | --- | --- | --- | --- | --- |
| HbA1c category | HbA1c value (%) | Model 1 (baseline mean 2013-2014) | | | |  | Model 2 (total exposure mean) | | | |  | Model 3 (time-varying mean) | | | |  |
| Hazard ratio | SD | P-value | [95% CI] |  | Hazard ratio | SD | P-value | [95% CI] |  | Hazard ratio | SD | P-value | [95% CI] |  |
| 1 | HbA1c < 6.0 | 1.40 | 0.08 | <0.001 | (1.25, 1.57) |  | 1.82 | 0.12 | <0.001 | (1.60, 2.08) |  | 3.09 | 0.16 | <0.001 | (2.79, 3.42) |  |
| 2 | 6.0 ≤ HbA1c < 6.5 | 1.22 | 0.06 | <0.001 | (1.11, 1.33) |  | 1.48 | 0.08 | <0.001 | (1.34, 1.65) |  | 1.48 | 0.08 | <0.001 | (1.33, 1.64) |  |
| 3 | 6.5 ≤ HbA1c < 7.0 | 1.07 | 0.04 | 0.115 | (0.98, 1.16) |  | 1.15 | 0.05 | 0.002 | (1.05, 1.25) |  | 1.18 | 0.06 | 0.001 | (1.07, 1.30) |  |
| 4† | 7.0 ≤ HbA1c < 7.5 | 1.00 | - | - | - |  | 1.00 | - | - | - |  | 1.00 | - | - | - |  |
| 5 | 7.5 ≤ HbA1c < 8.0 | 1.06 | 0.05 | 0.210 | (0.97, 1.17) |  | 1.14 | 0.06 | 0.009 | (1.03, 1.26) |  | 1.06 | 0.06 | 0.293 | (0.95, 1.19) |  |
| 6 | 8.0 ≤ HbA1c < 8.5 | 1.18 | 0.07 | 0.003 | (1.06, 1.31) |  | 1.28 | 0.07 | <0.001 | (1.14, 1.43) |  | 1.06 | 0.07 | 0.362 | (0.93, 1.21) |  |
| 7 | 8.5 ≤ HbA1c < 9.0 | 1.21 | 0.08 | 0.003 | (1.07, 1.38) |  | 1.25 | 0.09 | 0.002 | (1.09, 1.44) |  | 1.25 | 0.09 | 0.003 | (1.08, 1.45) |  |
| 8 | 9.0 ≤ HbA1c < 9.5 | 1.48 | 0.11 | <0.001 | (1.28, 1.71) |  | 1.25 | 0.11 | 0.013 | (1.05, 1.50) |  | 1.24 | 0.11 | 0.017 | (1.04, 1.47) |  |
| 9 | 9.5 ≤ HbA1c < 10 | 1.46 | 0.12 | <0.001 | (1.24, 1.73) |  | 1.66 | 0.16 | <0.001 | (1.36, 2.01) |  | 1.26 | 0.13 | 0.026 | (1.03, 1.55) |  |
| 10 | HbA1c ≥ 10 | 1.65 | 0.11 | <0.001 | (1.45, 1.88) |  | 2.00 | 0.17 | <0.001 | (1.70, 2.37) |  | 1.70 | 0.12 | <0.001 | (1.48, 1.96) |  |
| HVS category | HVS value |  |  |  |  |  |  |  |  |  |  |  |  |  |  |  |
| 1‡ | 0 - 20 | 1.00 | - | - | - |  | 1.00 | - | - | - |  | 1.00 | - | - | - |  |
| 2 | 21 - 40 | 1.32 | 0.05 | <0.001 | (1.22, 1.42) |  | 1.33 | 0.06 | <0.001 | (1.22, 1.45) |  | 1.36 | 0.06 | <0.001 | (1.25, 1.48) |  |
| 3 | 41 - 60 | 1.55 | 0.06 | <0.001 | (1.43, 1.67) |  | 1.63 | 0.07 | <0.001 | (1.49, 1.78) |  | 1.66 | 0.07 | <0.001 | (1.52, 1.80) |  |
| 4 | 61 - 80 | 1.90 | 0.08 | <0.001 | (1.74, 2.07) |  | 2.04 | 0.10 | <0.001 | (1.86, 2.25) |  | 2.11 | 0.10 | <0.001 | (1.92, 2.31) |  |
| 5 | 81 - 100 | 2.09 | 0.11 | <0.001 | (1.89, 2.32) |  | 2.36 | 0.14 | <0.001 | (2.11, 2.64) |  | 2.43 | 0.14 | <0.001 | (2.18, 2.71) |  |
|  |  |  |  |  |  |  |  |  |  |  |  |  |  |  |  |  |
| Number of subjects in model | | 53,934 | | | |  | 50,483 | | | |  | 53,432 | | | |  |
|  |  |  |  |  |  |  |  |  |  |  |  |  |  |  |  |  |
| **IHD** | | | | | | | | | | | | | | | | |
| HbA1c category | HbA1c value (%) | Model 1 (baseline mean 2013-2014) | | | |  | Model 2 (total exposure mean) | | | |  | Model 3 (time-varying mean) | | | |  |
| Hazard ratio | SD | P-value | [95% CI] |  | Hazard ratio | SD | P-value | [95% CI] |  | Hazard ratio | SD | P-value | [95% CI] |  |
| 1 | HbA1c < 6.0 | 1.22 | 0.06 | <0.001 | (1.10, 1.35) |  | 1.57 | 0.09 | <0.001 | (1.40, 1.76) |  | 1.96 | 0.09 | <0.001 | (1.80, 2.14) |  |
| 2 | 6.0 ≤ HbA1c < 6.5 | 1.06 | 0.04 | 0.147 | (0.98, 1.15) |  | 1.36 | 0.06 | <0.001 | (1.25, 1.49) |  | 1.20 | 0.05 | <0.001 | (1.11, 1.30) |  |
| 3 | 6.5 ≤ HbA1c < 7.0 | 0.98 | 0.03 | 0.558 | (0.91, 1.05) |  | 1.04 | 0.04 | 0.232 | (0.97, 1.12) |  | 1.08 | 0.04 | 0.040 | (1.00, 1.16) |  |
| 4† | 7.0 ≤ HbA1c < 7.5 | 1.00 | - | - | - |  | 1.00 | - | - | - |  | 1.00 | - | - | - |  |
| 5 | 7.5 ≤ HbA1c < 8.0 | 1.05 | 0.04 | 0.268 | (0.97, 1.13) |  | 1.14 | 0.05 | 0.001 | (1.05, 1.23) |  | 1.05 | 0.04 | 0.245 | (0.97, 1.14) |  |
| 6 | 8.0 ≤ HbA1c < 8.5 | 1.11 | 0.05 | 0.029 | (1.01, 1.22) |  | 1.19 | 0.06 | <0.001 | (1.08, 1.30) |  | 1.07 | 0.05 | 0.185 | (0.97, 1.17) |  |
| 7 | 8.5 ≤ HbA1c < 9.0 | 1.11 | 0.06 | 0.056 | (1.00, 1.24) |  | 1.14 | 0.06 | 0.019 | (1.02, 1.28) |  | 1.06 | 0.06 | 0.353 | (0.94, 1.18) |  |
| 8 | 9.0 ≤ HbA1c < 9.5 | 1.28 | 0.08 | <0.001 | (1.13, 1.45) |  | 1.28 | 0.09 | <0.001 | (1.13, 1.47) |  | 1.16 | 0.08 | 0.024 | (1.02, 1.32) |  |
| 9 | 9.5 ≤ HbA1c < 10 | 1.24 | 0.09 | 0.003 | (1.08, 1.42) |  | 1.46 | 0.11 | <0.001 | (1.26, 1.69) |  | 1.07 | 0.08 | 0.421 | (0.91, 1.25) |  |
| 10 | HbA1c ≥ 10 | 1.35 | 0.07 | <0.001 | (1.21, 1.50) |  | 1.67 | 0.10 | <0.001 | (1.48, 1.89) |  | 1.38 | 0.07 | <0.001 | (1.24, 1.53) |  |
| HVS category | HVS value |  |  |  |  |  |  |  |  |  |  |  |  |  |  |  |
| 1‡ | 0 - 20 | 1.00 | - | - | - |  | 1.00 | - | - | - |  | 1.00 | - | - | - |  |
| 2 | 21 - 40 | 1.13 | 0.04 | <0.001 | (1.06, 1.21) |  | 1.15 | 0.04 | <0.001 | (1.08, 1.24) |  | 1.16 | 0.04 | <0.001 | (1.08, 1.23) |  |
| 3 | 41 - 60 | 1.24 | 0.04 | <0.001 | (1.16, 1.33) |  | 1.26 | 0.04 | <0.001 | (1.17, 1.35) |  | 1.26 | 0.04 | <0.001 | (1.18, 1.35) |  |
| 4 | 61 - 80 | 1.31 | 0.05 | <0.001 | (1.21, 1.41) |  | 1.33 | 0.05 | <0.001 | (1.23, 1.43) |  | 1.40 | 0.05 | <0.001 | (1.31, 1.51) |  |
| 5 | 81 - 100 | 1.43 | 0.07 | <0.001 | (1.31, 1.56) |  | 1.47 | 0.07 | <0.001 | (1.34, 1.61) |  | 1.55 | 0.07 | <0.001 | (1.42, 1.69) |  |
|  |  |  |  |  |  |  |  |  |  |  |  |  |  |  |  |  |
| Number of subjects in model | | 46,980 | | | |  | 43,837 | | | |  | 53,432 | | | |  |
|  |  |  |  |  |  |  |  |  |  |  |  |  |  |  |  |  |
| **AMI** | | | | | | | | | | | | | | | | |
| HbA1c category | HbA1c value (%) | Model 1 (baseline mean 2013-2014) | | | |  | Model 2 (total exposure mean) | | | |  | Model 3 (time-varying mean) | | | |  |
| Hazard ratio | SD | P-value | [95% CI] |  | Hazard ratio | SD | P-value | [95% CI] |  | Hazard ratio | SD | P-value | [95% CI] |  |
| 1 | HbA1c < 6.0 | 1.33 | 0.11 | 0.001 | (1.12, 1.57) |  | 1.96 | 0.18 | <0.001 | (1.64, 2.35) |  | 2.44 | 0.17 | <0.001 | (2.13, 2.79) |  |
| 2 | 6.0 ≤ HbA1c < 6.5 | 1.05 | 0.07 | 0.474 | (0.92, 1.20) |  | 1.36 | 0.10 | <0.001 | (1.18, 1.57) |  | 1.39 | 0.09 | <0.001 | (1.22, 1.58) |  |
| 3 | 6.5 ≤ HbA1c < 7.0 | 1.06 | 0.06 | 0.311 | (0.95, 1.19) |  | 1.03 | 0.06 | 0.600 | (0.92, 1.16) |  | 1.11 | 0.07 | 0.105 | (0.98, 1.25) |  |
| 4† | 7.0 ≤ HbA1c < 7.5 | 1.00 | - | - | - |  | 1.00 | - | - | - |  | 1.00 | - | - | - |  |
| 5 | 7.5 ≤ HbA1c < 8.0 | 0.97 | 0.06 | 0.614 | (0.85, 1.10) |  | 1.01 | 0.06 | 0.871 | (0.89, 1.14) |  | 0.98 | 0.07 | 0.757 | (0.85, 1.12) |  |
| 6 | 8.0 ≤ HbA1c < 8.5 | 1.21 | 0.09 | 0.006 | (1.06, 1.39) |  | 1.16 | 0.08 | 0.041 | (1.01, 1.33) |  | 1.01 | 0.08 | 0.893 | (0.87, 1.18) |  |
| 7 | 8.5 ≤ HbA1c < 9.0 | 1.12 | 0.09 | 0.180 | (0.95, 1.31) |  | 1.06 | 0.09 | 0.514 | (0.90, 1.24) |  | 1.07 | 0.10 | 0.431 | (0.90, 1.28) |  |
| 8 | 9.0 ≤ HbA1c < 9.5 | 1.21 | 0.11 | 0.044 | (1.00, 1.45) |  | 1.06 | 0.11 | 0.572 | (0.87, 1.29) |  | 0.93 | 0.10 | 0.506 | (0.75, 1.15) |  |
| 9 | 9.5 ≤ HbA1c < 10 | 1.17 | 0.12 | 0.147 | (0.95, 1.44) |  | 1.31 | 0.15 | 0.015 | (1.05, 1.63) |  | 1.05 | 0.12 | 0.697 | (0.83, 1.32) |  |
| 10 | HbA1c ≥ 10 | 1.45 | 0.11 | <0.001 | (1.24, 1.69) |  | 1.57 | 0.14 | <0.001 | (1.31, 1.88) |  | 1.14 | 0.10 | 0.126 | (0.96, 1.35) |  |
| HVS category | HVS value |  |  |  |  |  |  |  |  |  |  |  |  |  |  |  |
| 1‡ | 0 - 20 | 1.00 | - | - | - |  | 1.00 | - | - | - |  | 1.00 | - | - | - |  |
| 2 | 21 - 40 | 1.33 | 0.08 | <0.001 | (1.19, 1.49) |  | 1.39 | 0.08 | <0.001 | (1.23, 1.56) |  | 1.37 | 0.08 | <0.001 | (1.22, 1.54) |  |
| 3 | 41 - 60 | 1.62 | 0.09 | <0.001 | (1.45, 1.80) |  | 1.70 | 0.10 | <0.001 | (1.51, 1.91) |  | 1.67 | 0.10 | <0.001 | (1.49, 1.87) |  |
| 4 | 61 - 80 | 1.81 | 0.11 | <0.001 | (1.60, 2.05) |  | 1.94 | 0.12 | <0.001 | (1.71, 2.19) |  | 1.97 | 0.12 | <0.001 | (1.75, 2.22) |  |
| 5 | 81 - 100 | 1.98 | 0.14 | <0.001 | (1.73, 2.28) |  | 2.21 | 0.16 | <0.001 | (1.91, 2.55) |  | 2.25 | 0.16 | <0.001 | (1.96, 2.58) |  |
|  |  |  |  |  |  |  |  |  |  |  |  |  |  |  |  |  |
| Number of subjects in model | | 53,583 | | | |  | 50,067 | | | |  | 53,432 | | | |  |
|  |  |  |  |  |  |  |  |  |  |  |  |  |  |  |  |  |
| **PAD** | | | | | | | | | | | | | | | | |
| HbA1c category | HbA1c value (%) | Model 1 (baseline mean 2013-2014) | | | |  | Model 2 (total exposure mean) | | | |  | Model 3 (time-varying mean) | | | |  |
| Hazard ratio | SD | P-value | [95% CI] |  | Hazard ratio | SD | P-value | [95% CI] |  | Hazard ratio | SD | P-value | [95% CI] |  |
| 1 | HbA1c < 6.0 | 1.28 | 0.14 | 0.026 | (1.03, 1.60) |  | 1.34 | 0.18 | 0.028 | (1.03, 1.74) |  | 1.83 | 0.17 | <0.001 | (1.53, 2.20) |  |
| 2 | 6.0 ≤ HbA1c < 6.5 | 1.03 | 0.09 | 0.759 | (0.87, 1.22) |  | 1.30 | 0.12 | 0.006 | (1.08, 1.56) |  | 1.31 | 0.11 | 0.001 | (1.11, 1.53) |  |
| 3 | 6.5 ≤ HbA1c < 7.0 | 1.10 | 0.08 | 0.181 | (0.96, 1.27) |  | 1.17 | 0.09 | 0.036 | (1.01, 1.35) |  | 1.20 | 0.09 | 0.013 | (1.04, 1.39) |  |
| 4† | 7.0 ≤ HbA1c < 7.5 | 1.00 | - | - | - |  | 1.00 | - | - | - |  | 1.00 | - | - | - |  |
| 5 | 7.5 ≤ HbA1c < 8.0 | 1.12 | 0.09 | 0.145 | (0.96, 1.30) |  | 1.17 | 0.09 | 0.037 | (1.01, 1.36) |  | 1.00 | 0.08 | 0.997 | (0.85, 1.18) |  |
| 6 | 8.0 ≤ HbA1c < 8.5 | 1.14 | 0.10 | 0.136 | (0.96, 1.35) |  | 1.28 | 0.11 | 0.004 | (1.08, 1.52) |  | 1.08 | 0.10 | 0.413 | (0.90, 1.29) |  |
| 7 | 8.5 ≤ HbA1c < 9.0 | 1.22 | 0.12 | 0.041 | (1.01, 1.47) |  | 1.39 | 0.13 | 0.001 | (1.15, 1.68) |  | 1.01 | 0.11 | 0.934 | (0.82, 1.25) |  |
| 8 | 9.0 ≤ HbA1c < 9.5 | 1.56 | 0.16 | <0.001 | (1.27, 1.92) |  | 1.57 | 0.17 | <0.001 | (1.27, 1.95) |  | 1.15 | 0.13 | 0.240 | (0.91, 1.44) |  |
| 9 | 9.5 ≤ HbA1c < 10 | 1.72 | 0.19 | <0.001 | (1.38, 2.14) |  | 1.49 | 0.20 | 0.002 | (1.15, 1.94) |  | 1.23 | 0.16 | 0.125 | (0.95, 1.59) |  |
| 10 | HbA1c ≥ 10 | 1.72 | 0.16 | <0.001 | (1.44, 2.06) |  | 2.29 | 0.24 | <0.001 | (1.87, 2.81) |  | 1.35 | 0.13 | 0.002 | (1.11, 1.63) |  |
| HVS category | HVS value |  |  |  |  |  |  |  |  |  |  |  |  |  |  |  |
| 1‡ | 0 - 20 | 1.00 | - | - | - |  | 1.00 | - | - | - |  | 1.00 | - | - | - |  |
| 2 | 21 - 40 | 1.56 | 0.11 | <0.001 | (1.36, 1.80) |  | 1.61 | 0.12 | <0.001 | (1.39, 1.86) |  | 1.63 | 0.12 | <0.001 | (1.41, 1.89) |  |
| 3 | 41 - 60 | 1.67 | 0.12 | <0.001 | (1.45, 1.93) |  | 1.70 | 0.13 | <0.001 | (1.47, 1.97) |  | 1.75 | 0.13 | <0.001 | (1.52, 2.02) |  |
| 4 | 61 - 80 | 2.02 | 0.16 | <0.001 | (1.73, 2.35) |  | 2.02 | 0.16 | <0.001 | (1.73, 2.36) |  | 2.17 | 0.17 | <0.001 | (1.87, 2.52) |  |
| 5 | 81 - 100 | 2.33 | 0.20 | <0.001 | (1.97, 2.77) |  | 2.41 | 0.21 | <0.001 | (2.02, 2.87) |  | 2.69 | 0.23 | <0.001 | (2.27, 3.18) |  |
|  |  |  |  |  |  |  |  |  |  |  |  |  |  |  |  |  |
| Number of subjects in model | | 53,626 | | | |  | 50,054 | | | |  | 53,432 | | | |  |
|  |  |  |  |  |  |  |  |  |  |  |  |  |  |  |  |  |
| **Hemorrhagic stroke** | | | | | | | | | | | | | | | | |
| HbA1c category | HbA1c value (%) | Model 1 (baseline mean 2013-2014) | | | |  | Model 2 (total exposure mean) | | | |  | Model 3 (time-varying mean) | | | |  |
| Hazard ratio | SD | P-value | [95% CI] |  | Hazard ratio | SD | P-value | [95% CI] |  | Hazard ratio | SD | P-value | [95% CI] |  |
| 1 | HbA1c < 6.0 | 1.61 | 0.24 | 0.002 | (1.20, 2.16) |  | 1.92 | 0.32 | <0.001 | (1.39, 2.66) |  | 2.02 | 0.26 | <0.001 | (1.57, 2.60) |  |
| 2 | 6.0 ≤ HbA1c < 6.5 | 1.29 | 0.16 | 0.037 | (1.02, 1.64) |  | 1.55 | 0.20 | 0.001 | (1.2, 2.00) |  | 1.22 | 0.15 | 0.106 | (0.96, 1.54) |  |
| 3 | 6.5 ≤ HbA1c < 7.0 | 1.26 | 0.13 | 0.031 | (1.02, 1.55) |  | 1.36 | 0.14 | 0.004 | (1.11, 1.66) |  | 1.06 | 0.12 | 0.585 | (0.85, 1.32) |  |
| 4† | 7.0 ≤ HbA1c < 7.5 | 1.00 | - | - | - |  | 1.00 | - | - | - |  | 1.00 | - | - | - |  |
| 5 | 7.5 ≤ HbA1c < 8.0 | 1.05 | 0.14 | 0.732 | (0.81, 1.35) |  | 1.02 | 0.13 | 0.857 | (0.80, 1.31) |  | 0.85 | 0.12 | 0.223 | (0.65, 1.11) |  |
| 6 | 8.0 ≤ HbA1c < 8.5 | 1.11 | 0.17 | 0.492 | (0.82, 1.50) |  | 1.01 | 0.16 | 0.960 | (0.74, 1.37) |  | 0.97 | 0.15 | 0.835 | (0.72, 1.31) |  |
| 7 | 8.5 ≤ HbA1c < 9.0 | 1.30 | 0.22 | 0.120 | (0.93, 1.81) |  | 0.95 | 0.18 | 0.796 | (0.65, 1.39) |  | 0.76 | 0.16 | 0.184 | (0.51, 1.14) |  |
| 8 | 9.0 ≤ HbA1c < 9.5 | 1.29 | 0.27 | 0.227 | (0.86, 1.93) |  | 1.21 | 0.27 | 0.400 | (0.78, 1.87) |  | 0.83 | 0.20 | 0.439 | (0.53, 1.32) |  |
| 9 | 9.5 ≤ HbA1c < 10 | 1.11 | 0.28 | 0.672 | (0.68, 1.82) |  | 1.28 | 0.33 | 0.353 | (0.76, 2.13) |  | 1.25 | 0.30 | 0.342 | (0.79, 1.99) |  |
| 10 | HbA1c ≥ 10 | 1.14 | 0.22 | 0.514 | (0.77, 1.66) |  | 1.35 | 0.31 | 0.193 | (0.86, 2.10) |  | 0.93 | 0.18 | 0.720 | (0.63, 1.37) |  |
| HVS category | HVS value |  |  |  |  |  |  |  |  |  |  |  |  |  |  |  |
| 1‡ | 0 - 20 | 1.00 | - | - | - |  | 1.00 | - | - | - |  | 1.00 | - | - | - |  |
| 2 | 21 - 40 | 0.97 | 0.10 | 0.722 | (0.80, 1.17) |  | 1.03 | 0.11 | 0.785 | (0.84, 1.26) |  | 1.00 | 0.10 | 0.976 | (0.82, 1.22) |  |
| 3 | 41 - 60 | 1.09 | 0.11 | 0.416 | (0.89, 1.33) |  | 1.11 | 0.12 | 0.327 | (0.90, 1.37) |  | 1.06 | 0.11 | 0.588 | (0.86, 1.30) |  |
| 4 | 61 - 80 | 1.27 | 0.15 | 0.044 | (1.01, 1.59) |  | 1.36 | 0.16 | 0.010 | (1.07, 1.71) |  | 1.29 | 0.15 | 0.026 | (1.03, 1.62) |  |
| 5 | 81 - 100 | 1.63 | 0.22 | <0.001 | (1.24, 2.13) |  | 1.86 | 0.26 | <0.001 | (1.42, 2.43) |  | 1.74 | 0.23 | <0.001 | (1.34, 2.25) |  |
|  |  |  |  |  |  |  |  |  |  |  |  |  |  |  |  |  |
| Number of subjects in model | | 54,071 | | | |  | 50,403 | | | |  | 53,432 | | | |  |
|  |  |  |  |  |  |  |  |  |  |  |  |  |  |  |  |  |
| **Ischemic stroke** | | | | | | | | | | | | | | | | |
| HbA1c category | HbA1c value (%) | Model 1 (baseline mean 2013-2014) | | | |  | Model 2 (total exposure mean) | | | |  | Model 3 (time-varying mean) | | | |  |
| Hazard ratio | SD | P-value | [95% CI] |  | Hazard ratio | SD | P-value | [95% CI] |  | Hazard ratio | SD | P-value | [95% CI] |  |
| 1 | HbA1c < 6.0 | 1.28 | 0.10 | 0.002 | (1.09, 1.50) |  | 1.53 | 0.13 | <0.001 | (1.29, 1.81) |  | 1.98 | 0.13 | <0.001 | (1.74, 2.27) |  |
| 2 | 6.0 ≤ HbA1c < 6.5 | 1.18 | 0.07 | 0.006 | (1.05, 1.33) |  | 1.30 | 0.09 | <0.001 | (1.14, 1.48) |  | 1.27 | 0.08 | <0.001 | (1.12, 1.43) |  |
| 3 | 6.5 ≤ HbA1c < 7.0 | 1.06 | 0.06 | 0.313 | (0.95, 1.17) |  | 1.01 | 0.05 | 0.832 | (0.91, 1.12) |  | 1.05 | 0.06 | 0.382 | (0.94, 1.18) |  |
| 4† | 7.0 ≤ HbA1c < 7.5 | 1.00 | - | - | - |  | 1.00 | - | - | - |  | 1.00 | - | - | - |  |
| 5 | 7.5 ≤ HbA1c < 8.0 | 1.23 | 0.08 | 0.001 | (1.09, 1.39) |  | 1.07 | 0.07 | 0.251 | (0.95, 1.21) |  | 1.02 | 0.07 | 0.802 | (0.89, 1.16) |  |
| 6 | 8.0 ≤ HbA1c < 8.5 | 1.20 | 0.09 | 0.012 | (1.04, 1.39) |  | 1.18 | 0.09 | 0.027 | (1.02, 1.36) |  | 1.16 | 0.09 | 0.048 | (1.00, 1.35) |  |
| 7 | 8.5 ≤ HbA1c < 9.0 | 1.32 | 0.11 | 0.001 | (1.12, 1.56) |  | 1.37 | 0.12 | <0.001 | (1.16, 1.62) |  | 1.33 | 0.11 | 0.001 | (1.13, 1.58) |  |
| 8 | 9.0 ≤ HbA1c < 9.5 | 1.43 | 0.14 | <0.001 | (1.17, 1.73) |  | 1.41 | 0.15 | 0.001 | (1.15, 1.72) |  | 1.09 | 0.12 | 0.414 | (0.88, 1.36) |  |
| 9 | 9.5 ≤ HbA1c < 10 | 1.47 | 0.17 | 0.001 | (1.18, 1.83) |  | 1.72 | 0.20 | <0.001 | (1.37, 2.16) |  | 1.40 | 0.16 | 0.004 | (1.11, 1.76) |  |
| 10 | HbA1c ≥ 10 | 1.80 | 0.15 | <0.001 | (1.52, 2.12) |  | 2.25 | 0.21 | <0.001 | (1.87, 2.71) |  | 1.71 | 0.14 | <0.001 | (1.46, 2.01) |  |
| HVS category | HVS value |  |  |  |  |  |  |  |  |  |  |  |  |  |  |  |
| 1‡ | 0 - 20 | 1.00 | - | - | - |  | 1.00 | - | - | - |  | 1.00 | - | - | - |  |
| 2 | 21 - 40 | 1.16 | 0.06 | 0.003 | (1.05, 1.28) |  | 1.16 | 0.06 | 0.004 | (1.05, 1.29) |  | 1.16 | 0.06 | 0.005 | (1.05, 1.28) |  |
| 3 | 41 - 60 | 1.25 | 0.06 | <0.001 | (1.13, 1.38) |  | 1.23 | 0.07 | <0.001 | (1.11, 1.37) |  | 1.23 | 0.06 | <0.001 | (1.11, 1.36) |  |
| 4 | 61 - 80 | 1.39 | 0.08 | <0.001 | (1.23, 1.56) |  | 1.37 | 0.08 | <0.001 | (1.22, 1.54) |  | 1.40 | 0.08 | <0.001 | (1.25, 1.57) |  |
| 5 | 81 - 100 | 1.60 | 0.11 | <0.001 | (1.40, 1.83) |  | 1.68 | 0.12 | <0.001 | (1.47, 1.93) |  | 1.77 | 0.12 | <0.001 | (1.56, 2.02) |  |
|  |  |  |  |  |  |  |  |  |  |  |  |  |  |  |  |  |
| Number of subjects in model | | 52,077 | | | |  | 48,579 | | | |  | 53,432 | | | |  |
|  |  |  |  |  |  |  |  |  |  |  |  |  |  |  |  |  |

† HbA1c category 4 used as reference.

‡ HVS category 1 used as reference.
